# Supplementary material for: 2′FL and LNnT Exert Antipathogenic Effects against C. difficile ATCC 9689 In Vitro, Coinciding with Increased Levels of Bifidobacteriaceae and/or Secondary Bile Acids
Source: MDPI journal article supplement (doi:10.3390/pathogens10080927), 2021-07-22
Supplement: s1 [file s1]

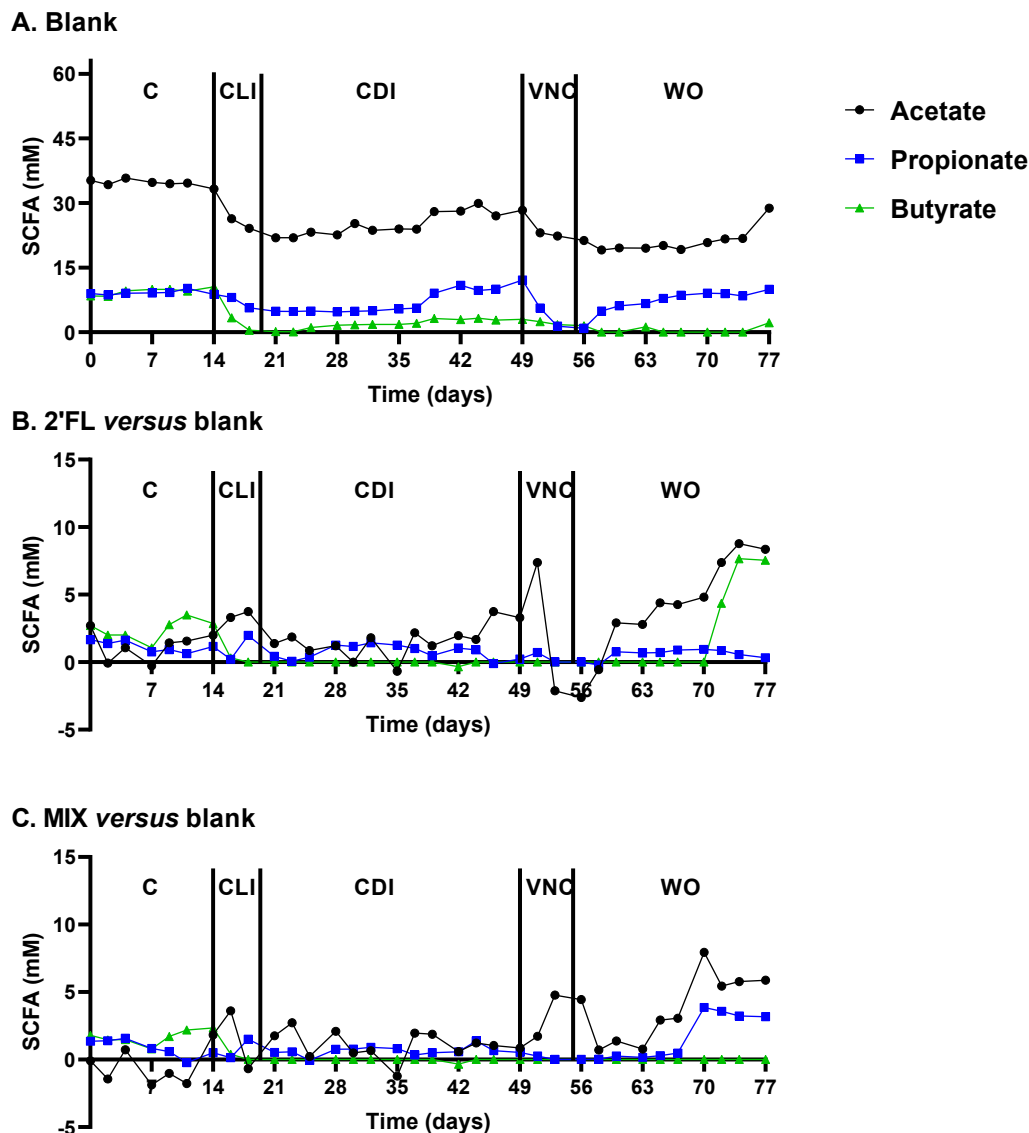

**Figure S1.** Acetate, propionate and butyrate levels (mM) in the proximal colon reactors during the long-term pathogut™ study (11 weeks) (test 2). Upon inoculation and stabilisation of the faecal inoculum of donor A during two weeks preceding the study (-14 – 0 days), a control period (0–14 days) was followed by a clindamycin treatment period (CLI: 14–21 days) which resulted in *C. difficile* infection (CDI: 21–49 days). From then on, while the blank was treated with vancomycin (VNC: 49–54 days), the other two arms additionally received 2'-FL and MIX, respectively. 2'-FL and MIX were further administered during the washout period (WO: 54–77 days). While the absolute levels are presented for the blank reactor (A), the levels upon treatment with 2'-FL (B) and MIX (C) are presented as the difference *versus* the blank reactor. 2'-FL = 2'-O-fucosyllactose, LNnT = lacto-N-neotetraose, MIX = 4:1 mixture of 2'-FL/LNnT.

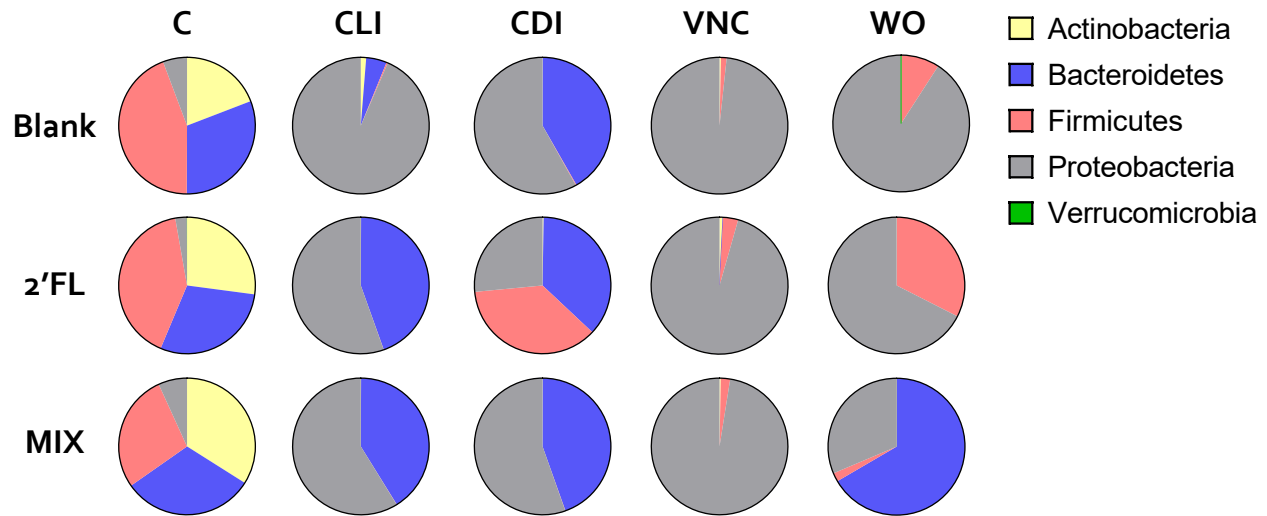

**Figure S2.** Microbial composition at phylum level in the distal colon reactors during the long-term pathogut™ study (11 weeks) as detected via 16S-targeted Illumina sequencing (test 2). Upon inoculation and stabilisation of the faecal inoculum of donor A during two weeks preceding the study (-14 – 0 days), a control period (0-14 days) was followed by a clindamycin treatment period (CLI: 14-21 days) which resulted in *C. difficile* infection (CDI: 21-49 days). From then on, while the blank was treated with vancomycin (VNC: 49-54 days), the other two arms additionally received 2'-FL and MIX, respectively. 2'-FL and MIX were further administered during the washout period (WO: 54-77 days). 2'-FL = 2'-O-fucosyllactose, LNnT = lacto-N-neotetraose, MIX = 4:1 mixture of 2'-FL/LNnT.

**Table S1.** Microbial composition at family level in the distal colon reactors during the long-term pathogut™ study (11 weeks) as detected via 16S-targeted Illumina sequencing (test 2). Upon inoculation and stabilisation of the faecal inoculum of donor A during two weeks preceding the study (-14 – 0 days), a control period (0-14 days) was followed by a clindamycin treatment period (CLI: 14-21 days) which resulted in *C. difficile* infection (CDI: 21-49 days). From then on, while the blank was treated with vancomycin (VNC: 49-54 days), the other two arms additionally received 2'-FL and MIX, respectively. 2'FL and MIX were further administered during the washout period (WO: 54-77 days). 2'FL = 2'-O-fucosyllactose, LNnT = lacto-N-neotetraose, MIX = 4:1 mixture of 2'FL/LNnT.

| Phylum          | Family                    | C     |       |       | CLI   |       |       | CDI   |       |       | TR    |       |       | WO    |       |       |
|-----------------|---------------------------|-------|-------|-------|-------|-------|-------|-------|-------|-------|-------|-------|-------|-------|-------|-------|
|                 |                           | Blank | 2'FL  | MIX   |
| Actinobacteria  | Bifidobacteriaceae        | 12.12 | 25.27 | 21.06 | 0.02  | 0.15  | 0.35  | 0.00  | 0.10  | 0.00  | 0.00  | 0.02  | 0.01  | 0.00  | 0.00  | 0.00  |
|                 | Coriobacteriaceae         | 0.36  | 0.27  | 0.29  | 0.00  | 0.01  | 0.06  | 0.04  | 0.03  | 0.02  | 0.00  | 0.00  | 0.00  | 0.00  | 0.00  | 0.00  |
|                 | Micrococcaceae            | 0.00  | 0.00  | 0.00  | 0.00  | 0.00  | 0.00  | 0.01  | 0.00  | 0.00  | 0.13  | 0.07  | 0.14  | 0.01  | 0.01  | 0.00  |
| Bacteroidetes   | Bacteroidaceae            | 17.59 | 17.50 | 17.66 | 47.92 | 46.57 | 46.15 | 11.56 | 12.12 | 8.47  | 0.03  | 0.00  | 0.01  | 0.00  | 0.00  | 43.62 |
|                 | Bacteroidales_S24-7_group | 0.43  | 0.00  | 0.00  | 0.00  | 0.00  | 0.00  | 0.00  | 0.00  | 0.00  | 0.00  | 0.00  | 0.00  | 0.00  | 0.00  | 0.00  |
|                 | Porphyromonadaceae        | 5.24  | 2.05  | 4.79  | 0.00  | 0.00  | 0.01  | 0.28  | 0.29  | 0.62  | 0.00  | 0.00  | 0.01  | 12.68 | 25.15 | 0.00  |
|                 | Prevotellaceae            | 6.68  | 11.07 | 10.59 | 0.00  | 0.00  | 0.00  | 0.00  | 0.33  | 0.32  | 0.00  | 0.00  | 0.00  | 0.00  | 0.00  | 0.00  |
|                 | Rikenellaceae             | 0.32  | 0.06  | 0.04  | 0.00  | 0.00  | 0.00  | 0.00  | 0.00  | 0.00  | 0.00  | 0.00  | 0.00  | 0.00  | 10.42 | 0.00  |
| Firmicutes      | Acidaminococcaceae        | 22.21 | 22.56 | 25.02 | 0.00  | 0.01  | 0.01  | 0.11  | 2.10  | 2.02  | 32.23 | 6.00  | 0.00  | 7.47  | 0.81  | 0.00  |
|                 | Clostridiaceae_1          | 0.00  | 0.00  | 0.00  | 0.00  | 0.00  | 0.00  | 0.00  | 0.00  | 0.00  | 0.00  | 0.00  | 0.00  | 0.00  | 0.00  | 0.00  |
|                 | Enterococcaceae           | 0.00  | 0.00  | 0.00  | 0.00  | 0.00  | 0.00  | 0.01  | 0.02  | 0.00  | 0.15  | 0.03  | 0.68  | 0.11  | 0.15  | 0.01  |
|                 | Eubacteriaceae            | 0.19  | 0.11  | 0.04  | 0.00  | 0.00  | 0.00  | 0.03  | 0.03  | 0.00  | 0.00  | 0.00  | 0.00  | 0.00  | 1.33  | 0.00  |
|                 | Lachnospiraceae           | 18.10 | 13.86 | 12.11 | 0.00  | 0.02  | 0.03  | 2.86  | 4.00  | 1.88  | 0.41  | 0.06  | 0.10  | 7.18  | 34.81 | 33.79 |
|                 | Lactobacillaceae          | 0.00  | 0.00  | 0.00  | 0.00  | 0.00  | 0.00  | 0.00  | 7.67  | 0.00  | 0.00  | 0.03  | 5.16  | 0.00  | 0.67  | 0.03  |
|                 | Paenibacillaceae          | 0.00  | 0.00  | 0.00  | 0.00  | 0.00  | 0.00  | 0.00  | 0.00  | 0.00  | 0.00  | 0.01  | 0.59  | 0.00  | 0.03  | 0.00  |
|                 | Planococcaceae            | 0.00  | 0.00  | 0.00  | 0.00  | 0.00  | 0.00  | 0.00  | 0.00  | 0.00  | 0.00  | 0.00  | 0.02  | 0.00  | 0.00  | 0.00  |
|                 | Ruminococcaceae           | 1.14  | 0.38  | 0.49  | 0.01  | 0.13  | 0.15  | 0.15  | 0.09  | 0.04  | 0.05  | 0.00  | 0.01  | 0.41  | 0.13  | 0.36  |
|                 | Staphylococcaceae         | 0.00  | 0.00  | 0.00  | 0.00  | 0.00  | 0.00  | 0.00  | 0.00  | 0.00  | 0.07  | 0.00  | 0.00  | 0.00  | 0.00  | 0.00  |
|                 | Veillonellaceae           | 3.59  | 1.05  | 1.27  | 0.00  | 0.00  | 0.01  | 0.00  | 0.00  | 0.00  | 0.00  | 0.00  | 0.00  | 0.00  | 0.00  | 0.00  |
| Proteobacteria  | Alcaligenaceae            | 1.27  | 0.42  | 0.72  | 0.00  | 0.01  | 0.08  | 0.17  | 0.07  | 0.02  | 1.22  | 9.76  | 2.32  | 0.35  | 0.11  | 0.01  |
|                 | Brucellaceae              | 0.03  | 0.01  | 0.02  | 0.01  | 0.18  | 0.56  | 0.06  | 0.05  | 0.02  | 1.89  | 0.50  | 4.39  | 0.41  | 0.31  | 0.02  |
|                 | Burkholderiaceae          | 0.00  | 0.00  | 0.00  | 0.00  | 0.01  | 0.01  | 0.00  | 0.00  | 0.00  | 0.01  | 0.00  | 0.00  | 0.00  | 0.00  | 0.00  |
|                 | Desulfovibrionaceae       | 0.04  | 0.01  | 0.02  | 0.01  | 0.02  | 0.01  | 0.02  | 0.03  | 0.03  | 0.22  | 0.00  | 0.06  | 0.03  | 0.03  | 0.01  |
|                 | Enterobacteriaceae        | 2.13  | 0.38  | 1.27  | 48.37 | 47.69 | 45.69 | 13.92 | 2.35  | 10.56 | 55.85 | 81.74 | 68.58 | 16.79 | 2.68  | 0.59  |
|                 | Pseudomonadaceae          | 3.62  | 2.31  | 2.36  | 3.66  | 4.97  | 6.68  | 0.74  | 0.54  | 0.57  | 3.21  | 1.71  | 16.09 | 1.28  | 0.23  | 0.33  |
|                 | Rhodospirillaceae         | 1.40  | 1.08  | 0.76  | 0.00  | 0.00  | 0.00  | 0.13  | 0.21  | 0.08  | 0.00  | 0.00  | 0.00  | 0.00  | 0.00  | 0.00  |
|                 | Xanthomonadaceae          | 0.17  | 0.01  | 0.00  | 0.01  | 0.03  | 0.19  | 0.01  | 0.01  | 0.00  | 0.47  | 0.04  | 1.70  | 0.18  | 0.42  | 0.00  |
| Verrucomicrobia | Verrucomicrobiaceae       | 2.32  | 1.57  | 1.48  | 0.00  | 0.00  | 0.01  | 69.32 | 69.95 | 75.34 | 4.02  | 0.03  | 0.11  | 53.06 | 22.72 | 21.22 |

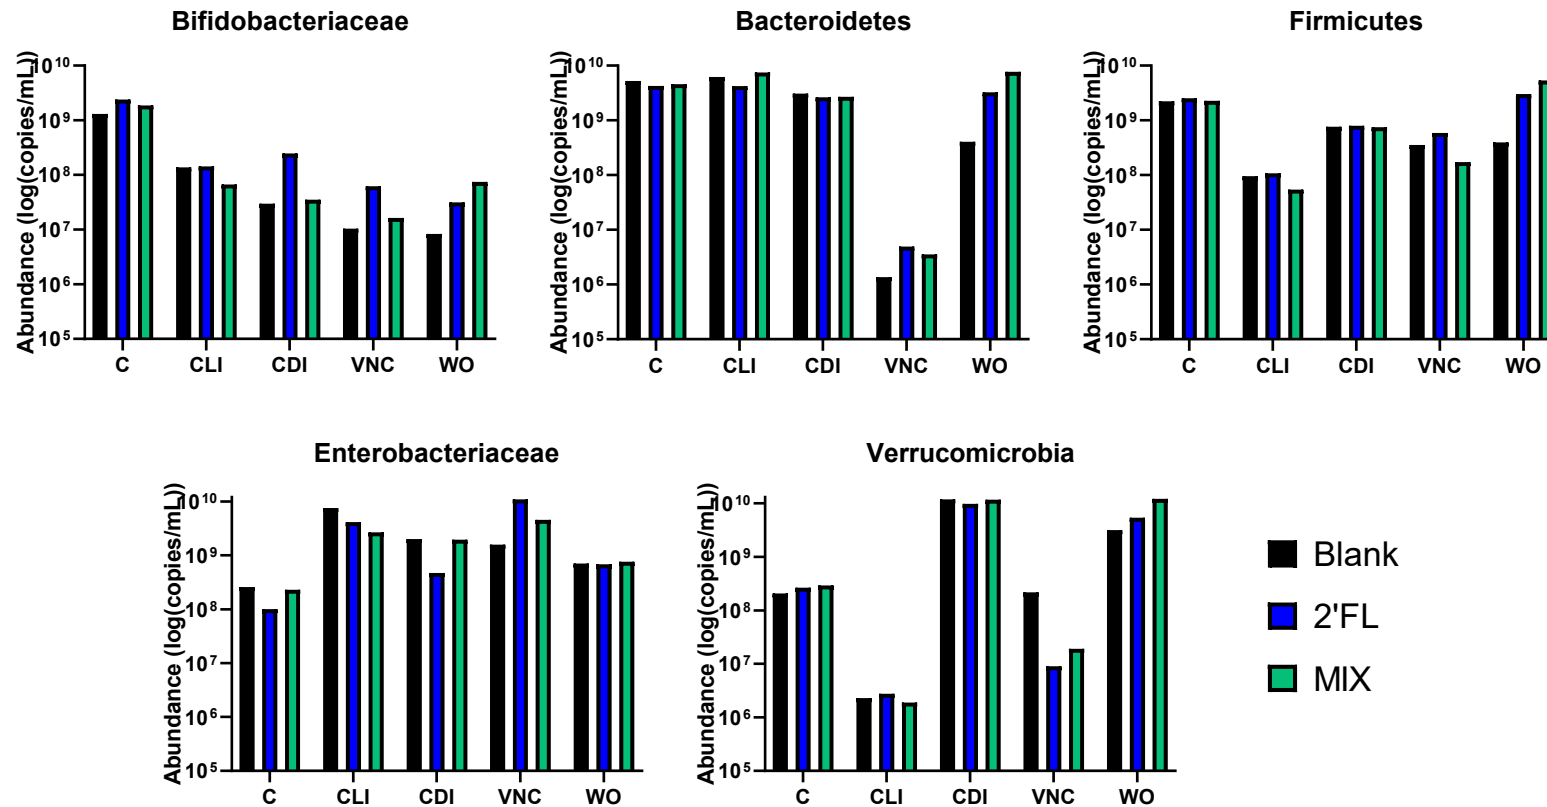

**Figure S3.** Microbial composition in the distal colon reactors during the long-term pathogut™ study (11 weeks) as detected via microbial group-specific qPCRs (test 2). Upon inoculation and stabilisation of the faecal inoculum of donor A during two weeks preceding the study (-14 – 0 days), a control period (0-14 days) was followed by a clindamycin treatment period (CLI: 14-21 days) which resulted in *C. difficile* infection (CDI: 21-49 days). From then on, while the blank was treated with vancomycin (VNC: 49-54 days), the other two arms additionally received 2'-FL and MIX, respectively. 2'-FL and MIX were further administered during the washout period (WO: 54-77 days). 2'-FL = 2'-O-fucosyllactose, LNnT = lacto-N-neotetraose, MIX = 4:1 mixture of 2'-FL/LNnT.

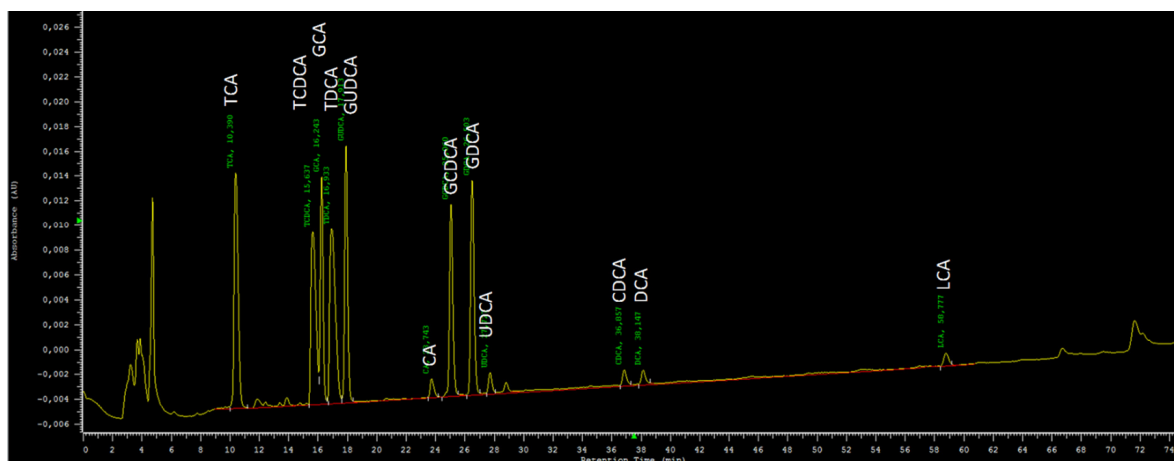

**Figure S4.** Chromatographic separation of twelve bile acids in one single run using reversed-phase HPLC-UV.
